# Supplementary material
Source: PubMed Central journal article supplement (PMC8650724)
Supplement: NIHMS1647644-supplement-1.pdf [file NIHMS1647644-supplement-1.pdf]

Supplementary Table 1: List of ICD-19 codes included to identify patients with liver disease-related mortality

| ICD-10 code | ICD-code name                                            |
|-------------|----------------------------------------------------------|
| C22.0       | Liver cell carcinoma - Malignant neoplasms               |
| K70.0       | Alcoholic fatty liver                                    |
| K70.1       | Alcoholic hepatitis                                      |
| K70.2       | Alcoholic fibrosis and sclerosis of liver                |
| K70.3       | Alcoholic cirrhosis of liver                             |
| K70.4       | Alcoholic hepatic failure                                |
| K70.9       | Alcoholic liver disease, unspecified                     |
| K71.7       | Toxic liver disease with fibrosis and cirrhosis of liver |
| K73.0       | Chronic persistent hepatitis, not elsewhere specified    |
| K73.1       | Chronic lobular hepatitis, not elsewhere classified      |
| K73.2       | Chronic active hepatitis, not elsewhere classified       |
| K73.8       | Other chronic hepatitis, not elsewhere classified        |
| K73.9       | Chronic hepatitis, unspecified                           |
| K74.0       | Hepatic fibrosis                                         |
| K74.1       | Hepatic sclerosis                                        |
| K74.2       | Hepatic fibrosis with hepatic sclerosis                  |
| K74.3       | Primary biliary cirrhosis                                |
| K74.4       | Secondary biliary cirrhosis                              |
| K74.5       | Biliary cirrhosis, unspecified                           |
| K74.6       | Other and unspecified cirrhosis of liver                 |
| K76.6       | Portal hypertension                                      |
| K76.7       | Hepatorenal syndrome                                     |

Supplementary Table 2: Beta coefficients for all covariates in linear regression models evaluating factors associated with county-level age-adjusted liver disease-related mortality rates

| Variable                                      | Beta coefficient     | P-value | Unadjusted R <sup>2</sup> |
|-----------------------------------------------|----------------------|---------|---------------------------|
| County-level racial/ethnic composition        |                      |         |                           |
| % White Hispanic                              | 0.25 (0.21, 0.39)    | <0.001  | 0.08                      |
| % Black Hispanic                              | -1.05 (-1.99, -0.10) | 0.03    | 0.002                     |
| % Black non-Hispanic                          | -0.07 (-0.11, -0.04) | <0.001  | 0.008                     |
| % Asian                                       | -0.35 (-0.48, -0.22) | <0.001  | 0.01                      |
| % American Indian                             | 1.07 (1.01, 1.12)    | <0.001  | 0.40                      |
| % adults living below poverty level           | 0.83 (0.73, 0.93)    | <0.001  | 0.11                      |
| % uninsured                                   | 0.76 (0.68, 0.83)    | <0.001  | 0.17                      |
| Miles to closest liver transplant center*     | 0.31 (0.27, 0.36)    | <0.001  | 0.08                      |
| Rural/urban status                            |                      |         |                           |
| Large metropolitan                            | Reference            |         |                           |
| Small/medium metropolitan                     | 3.63 (2.30, 4.98)    | <0.001  |                           |
| Rural                                         | 6.39 (5.17, 7.62)    | <0.001  |                           |
| Number of board-certified gastroenterologists | -0.04 (-0.06, -0.02) | <0.001  | 0.008                     |
| % with diabetes                               | 1.77 (1.56, 2.01)    | <0.001  | 0.09                      |
| % with obesity                                | 0.52 (0.41, 0.63)    | <0.001  | 0.04                      |
| % with heavy alcohol use                      | 0.20 (-0.009, 0.40)  | 0.06    | 0.002                     |
| Listings per 100 deaths                       | -0.11 (-0.13, -0.10) | <0.001  | 0.09                      |

\* Per 10-mile increments
